# Supplementary material for: Magnetic dimensionality and the crystal structure of two copper(ii) coordination polymers containing Cu6 and Cu2 building units
Source: Royal Society of Chemistry journal article supplement (doi:10.1039/c9dt01728c), 2019-01-01
Supplement: c9dt01728c1.pdf [file c9dt01728c1.pdf]

**Electronic Supplementary Information**

**Magnetic Dimensionality and Crystal Structure of Two Copper(II)  
Coordination Polymers Containing Cu<sub>6</sub> and Cu<sub>2</sub> Building Units**

**Negar Rad-Yousefnia <sup>a</sup>, Behrouz Shaabani <sup>\*,a</sup>, Maria Korabik<sup>\*,b</sup>, Marek Weselski <sup>b</sup>,  
Mansoureh Zahedi <sup>a</sup>, Ulli Englert <sup>c</sup>, Rahman Bikas <sup>d</sup>, Daria Szeliga <sup>b</sup>, Marta Otreba <sup>b</sup>, Tadeusz  
Lis <sup>b</sup>**

<sup>a</sup> *Department of Inorganic Chemistry, Faculty of Chemistry, University of Tabriz, Tabriz, Iran*

*\*Email: [shaabani.b@gmail.com](mailto:shaabani.b@gmail.com) ([shaabani@tabrizu.ac.ir](mailto:shaabani@tabrizu.ac.ir))*

<sup>b</sup> *Faculty of Chemistry, University of Wrocław, F. Joliot-Curie 14, Wrocław 50-383, Poland*

*\*Email: [maria.korabik@chem.uni.wroc.pl](mailto:maria.korabik@chem.uni.wroc.pl)*

<sup>c</sup> *Institute of Inorganic Chemistry, RWTH Aachen University, Landoltweg 1, 52074 Aachen, Germany*

<sup>d</sup> *Department of Chemistry, Faculty of Science, Imam Khomeini International University, 34148-96818, Qazvin,  
Iran*

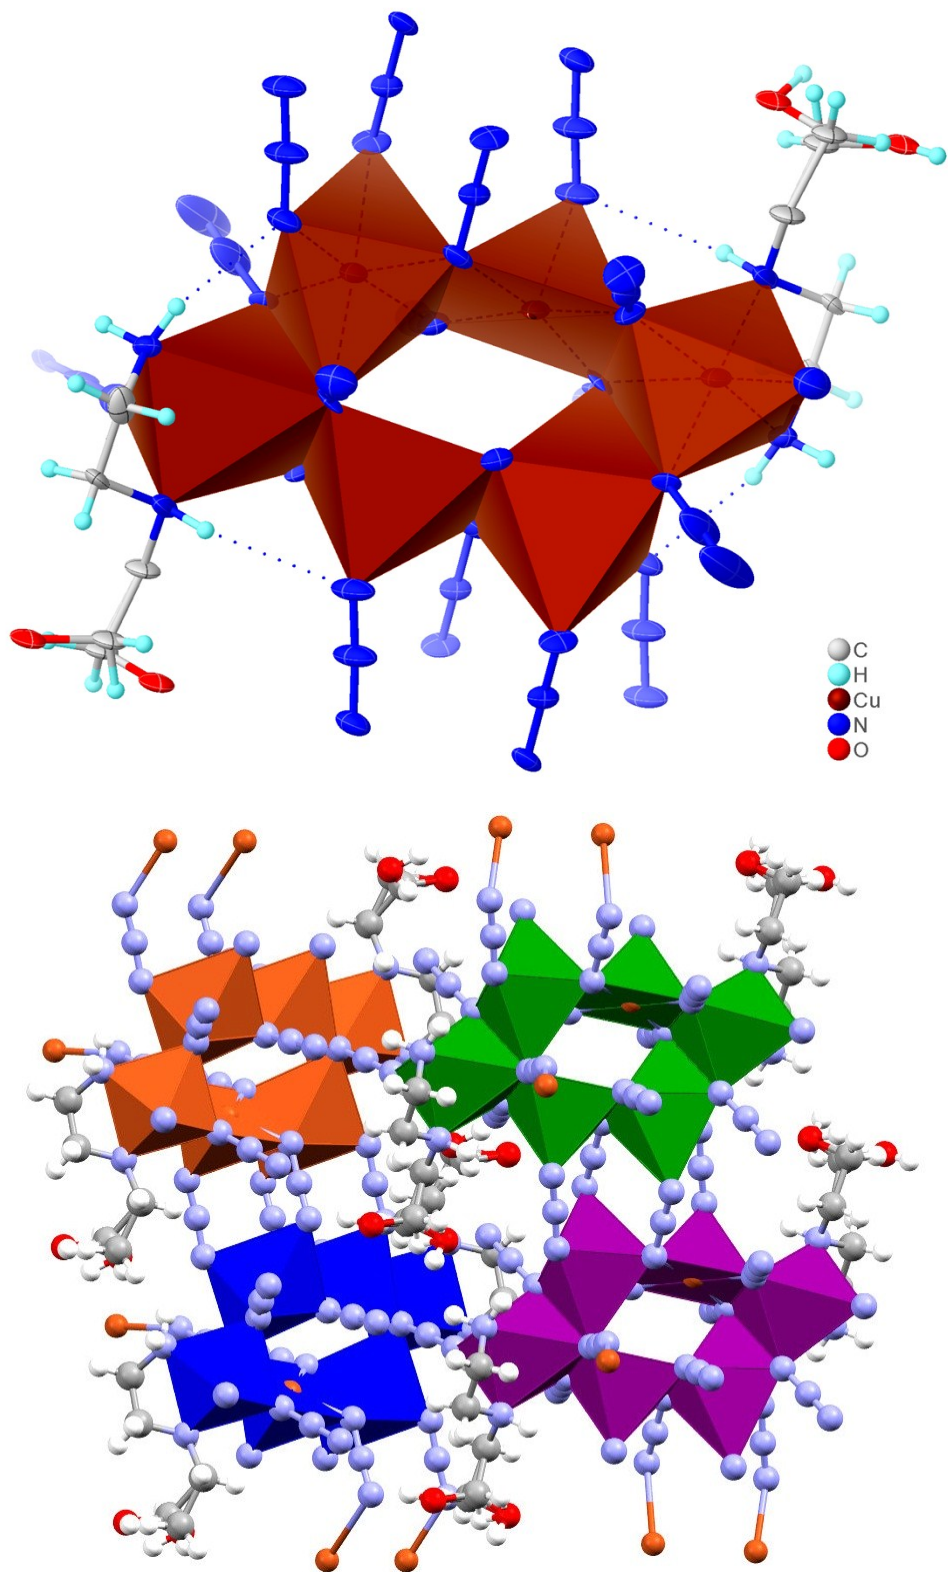

**Fig S1:** Coordination environment around the Cu(II) ions in hexanuclear units and the connection of hexanuclear units through azide bridges in the crystal structure of compound **1**.

The spin Hamiltonian of the hexanuclear copper-azido cluster with similar magnetic pathways to compound **1** and  $J$  parameter of interactions was written as<sup>50, 56</sup>:

$$\hat{H}_{\text{hexa}} = -2J(\hat{S}_1\hat{S}_2 + \hat{S}_2\hat{S}_3 + \hat{S}_3\hat{S}_4 + \hat{S}_4\hat{S}_5 + \hat{S}_5\hat{S}_6 + \hat{S}_6\hat{S}_1)$$

Magnetic susceptibility for this model is given:

$$\chi_{\text{hexa}} = \frac{2Ng^2\beta^2}{kT} \frac{14 + 9 \exp\left(-\frac{10J}{kT}\right) + 25 \exp\left(-\frac{6J}{kT}\right)}{7 + 5 \exp\left(-\frac{12J}{kT}\right) + 25 \exp\left(-\frac{6J}{kT}\right)}$$

The molecular field term was used to describe intermolecular interactions (between hexanuclear units):

$$\chi_m = \frac{\chi_{\text{hexa}}}{1 - \chi_{\text{hexa}} \left( \frac{2zJ'}{Ng^2\beta^2} \right)}$$

The best fit gives parameters:  $g=1.83$ ,  $J=3.56 \text{ cm}^{-1}$ ,  $zJ'=0.53$ ,  $R=2.2 \cdot 10^{-3}$ ,

where  $R = \sum_{i=1}^n \frac{(\chi_i^{\text{exp}} - \chi_i^{\text{calc}})^2}{(\chi_i^{\text{exp}})^2}$ . Although the match of  $\chi_m(T)$  is good, the parameters obtained are incorrect. The discrepancy between experimental and theoretical curve is also seen in  $\chi_m T(T)$ .

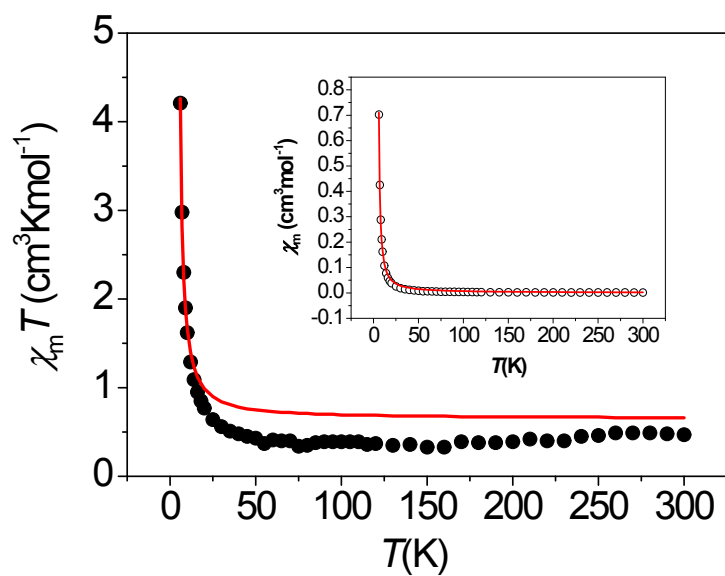

**Fig S2:** Temperature dependence of  $\chi_m T$  product ( magnetic susceptibility  $\chi_m$  calculated per one Cu(II) ion). Inset represents  $\chi_m(T)$  relation and the solid lines the best fitting of the data.

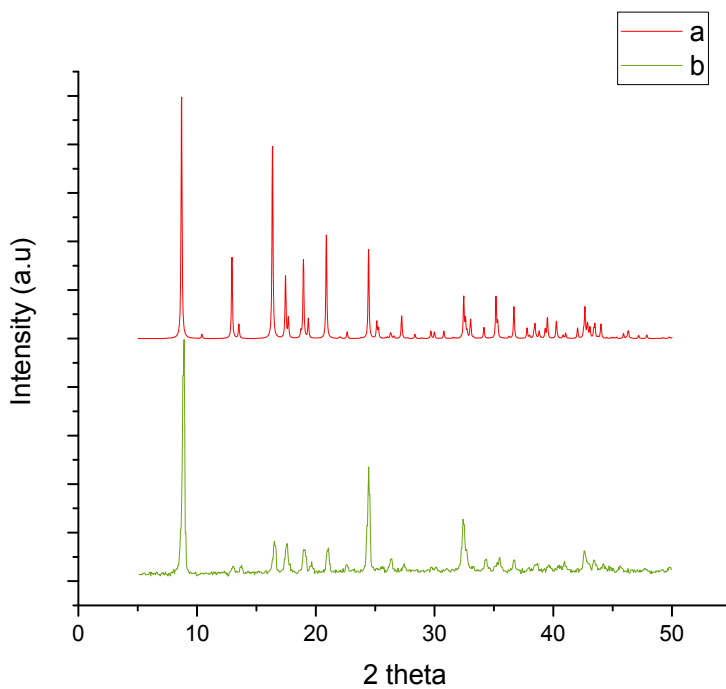

**Fig. S3.** XRD patterns of: simulated from the crystallographic data of compound **2** (a) and nanosheets of **2a** synthesized by using the ultrasonic method (b)

a

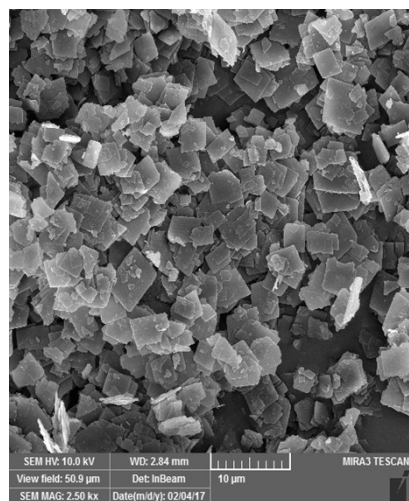

b

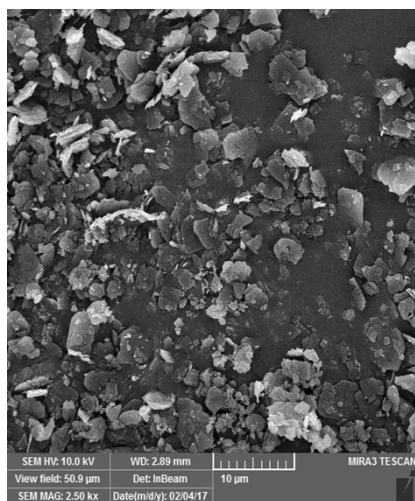

c

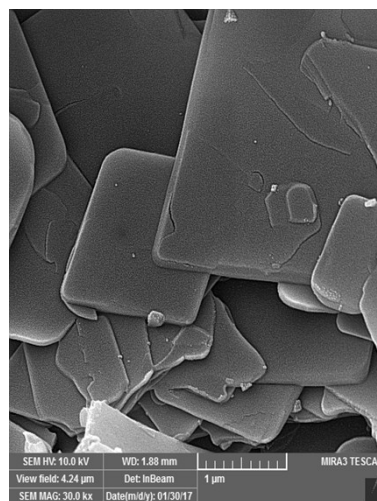

**Fig. S4.** a) SEM image of 2a prepared with  $[\text{Cu}^{2+}] = 0.15 \text{ M}$ ,  $[\text{HL}] = 0.3 \text{ M}$ ,  $[\text{Fe}^{2+}] = 0.1 \text{ M}$  and under a reaction time of 30 min; b) SEM image of 2b prepared with  $[\text{Cu}^{2+}] = 0.15 \text{ M}$ ,  $[\text{HL}] = 0.3 \text{ M}$ ,  $[\text{Fe}^{2+}] = 0.1 \text{ M}$  and under a reaction time of 60 min; c) SEM image of 2c prepared with  $[\text{Cu}^{2+}] = 0.015 \text{ M}$ ,  $[\text{HL}] = 0.03 \text{ M}$ ,  $[\text{Fe}^{2+}] = 0.01 \text{ M}$  and under a reaction time of 30 min.
